# Supplementary material for: A novel anesthesia regime enables neurofunctional studies and imaging genetics across mouse strains
Source: Springer Nature journal article supplement (doi:10.1038/srep24523), 2016-04-15
Supplement: 41598_2016_BFsrep24523_MOESM42_ESM.pdf [file 41598_2016_BFsrep24523_MOESM42_ESM.pdf]

## SUPPLEMENTARY INFORMATION

### **A novel anesthesia regime enables neurofunctional studies and imaging genetics across mouse strains**

**Marija M. Petrinovic<sup>1</sup>, Georges Hankov<sup>2</sup>, Aileen Schroeter<sup>2,3</sup>, Andreas Bruns<sup>1</sup>, Markus Rudin<sup>2,3,4</sup>, Markus von Kienlin<sup>1</sup>, Basil Künnecke<sup>1</sup>, Thomas Mueggler<sup>1\*</sup>**

<sup>1</sup>Roche Pharmaceutical Research & Early Development, Neuroscience Discovery, Roche Innovation Center Basel, F. Hoffmann-La Roche Ltd, Grenzacherstrasse 124, 4070 Basel, Switzerland

<sup>2</sup>Institute for Biomedical Engineering, University and ETH Zurich, Wolfgang-Pauli-Strasse 27, 8093 Zurich, Switzerland

<sup>3</sup>Neuroscience Center Zurich, University and ETH Zurich, Winterthurerstrasse 190, 8057 Zurich, Switzerland

<sup>4</sup>Institute of Pharmacology and Toxicology, University of Zurich, Winterthurerstrasse 190, 8057 Zurich, Switzerland

## Supplementary Figure S1

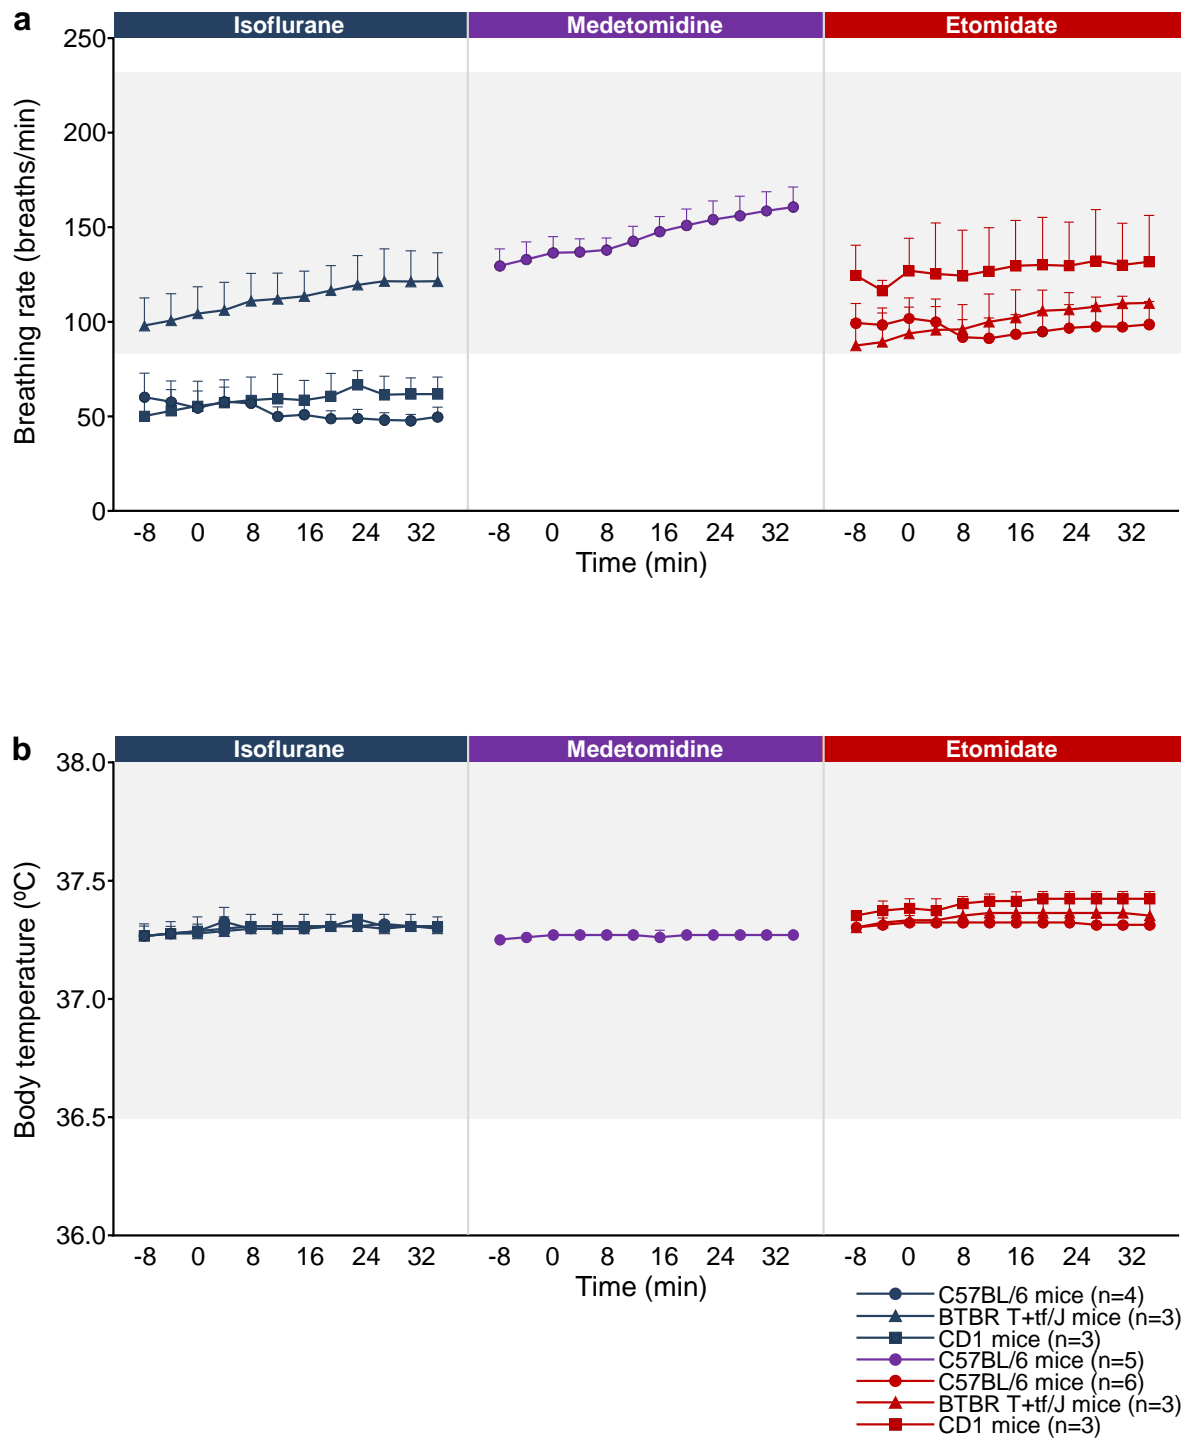

**Supplementary Figure S1. Comparison of physiological parameters during the fMRI acquisitions at baseline conditions and during acetazolamide challenge under the different anesthesia regimens in C57BL/6J, BTBR T+tf/J and CD1 mice. (a) Breathing rate. (b) Body temperature.** Acetazolamide was administered at  $t = 0$ . The gray-shaded areas designate the physiological spans. Line charts represent sample means; error bars represent standard deviations to visualize the spread of individual animals. Sample sizes are provided in each legend.

Supplementary Figure S2

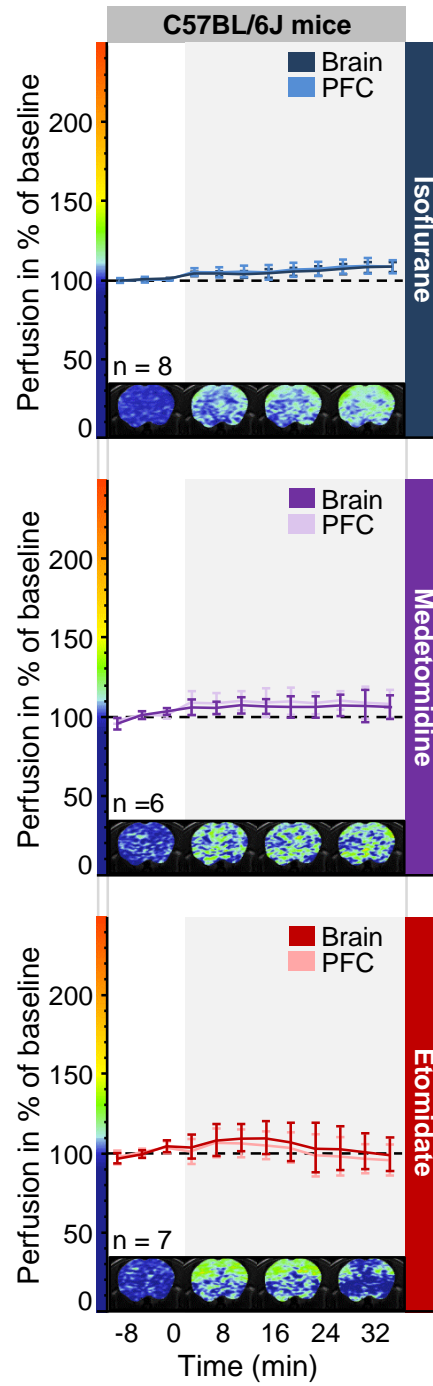

**Supplementary Figure S2. Cerebral perfusion in freely breathing C57BL/6J mice upon intraperitoneal injection of saline (vehicle) as a negative control under different anesthetics.** Graphs show the time course of the perfusion response in whole brain and the PFC before and after the injection of saline under (a) isoflurane, (b) medetomidine and (c) etomidate-based anesthesia. Saline was injected intravenously in isoflurane- and medetomidine-anesthetized animals and intraperitoneally under etomidate. Changes in absolute perfusion are presented as group-mean percent change relative to baseline (black dashed line at 100%) to allow comparison of different regions of interest. The left border of the gray-shaded area designates the time-point of saline application. Color-coded magnetic resonance images represent the percentage change of perfusion (according to the color bar along the y axis) as an average over three consecutive time-points for a representative coronal plane (+1.34 mm relative to bregma). Line charts represent sample means; error bars represent 95% confidence intervals to visualize significant deviations from baseline. Group sample sizes are provided below each graph. PFC, prefrontal cortex.
